# Supplementary material for: Use of Monocyte-Derived Macrophage Culture Increases Zika Virus Isolation Rate from Human Plasma
Source: Viruses. 2019 Nov 14;11(11):1058. doi: 10.3390/v11111058 (PMC6893817; doi:10.3390/v11111058)
Supplement: Supplementary file 1 [file viruses-11-01058-s001.pdf]

# Supplementary Materials:

Suppl. S1. Number of ZIKV isolations according to the cell culture system used and antibody status.

|                                            | Virus isolation |                | P-value* |
|--------------------------------------------|-----------------|----------------|----------|
|                                            | Isol. Neg. (%)  | Isol. Pos. (%) |          |
| Direct inoculation in cell lines           |                 |                |          |
| Vero (n=42)                                | 38 (90.48)      | 4 (9.52)       | ref      |
| C6/36 (n=42)                               | 38 (90.48)      | 4 (9.52)       | ns       |
| JEG-3 (n=42)                               | 39 (92.86)      | 3 (7.14)       | ns       |
| Antibody positive (n=19)                   | 19 (100)        | 0 (0)          | ref      |
| Antibody negative (n=18)                   | 12 (66.67)      | 6 (33.33)      | 0.008    |
| Gray zone (n=5)                            | 5 (100)         | 0 (0)          | ns       |
| Inoculation in cell lines after MDM rescue |                 |                |          |
| MDM followed by Vero (n=33)                | 25 (75.76)      | 8 (24.24)      | ref      |
| MDM followed by C6/36 (n=33)               | 24 (72.73)      | 9 (27.27)      | ns       |
| MDM followed by JEG-3 (n=33)               | 24 (72.73)      | 9 (27.27)      | ns       |
| Antibody positive (n=12)                   | 9 (75)          | 3 (25)         | ref      |
| Antibody negative (n=17)                   | 10 (58.82)      | 7 (41.18)      | ns       |
| Gray zone (n=4)                            | 4(100)          | 0 (0)          | ns       |

Isol.: isolation; Neg: negative; Pos: positive; ref: reference; \* P-value calculated using Chi-square Test or Fisher Exact Test (when n<5), with significance set as  $\alpha=0.05$ . ns: non-statistically significant.

Suppl. S2. Number of plasma samples and MDM donors tested.

| Number of plasma samples | Number of MDMs donors infected | Number of positive samples after MDM culture * | Number of isolates generated † | Cell lines that generated isolates (number of isolates produced) § |
|--------------------------|--------------------------------|------------------------------------------------|--------------------------------|--------------------------------------------------------------------|
| 12                       | 1                              | 8/12                                           | 0/8                            | none                                                               |
| 9                        | 2                              | 8/9                                            | 0/8                            | none                                                               |
| 18                       | 4                              | 14/18                                          | 8/14                           | Vero, C6/36 and JEG-3 (6)<br>C6/36 (2)                             |
| 1                        | 6                              | 1/1                                            | 0/1                            | none                                                               |
| 2                        | 7                              | 2/2                                            | 2/2                            | Vero, C6/36 and JEG-3 (1)<br>Vero (1)                              |
| 42                       | 10                             | 33/42                                          | 10/33                          |                                                                    |

\* Number of plasma samples from which replicative virion were rescued by MDM culture regardless the number of MDM supernatants that were positives. †Number of ZIKV isolates generated in different cell lines after rescuing the virus in MDMs. §Cell lines in which the isolates were expanded after rescuing the virus in MDMs.

Suppl. S3. Viral load and infectivity titers in MDM cultures and in P3 supernatants from cells lines inoculated with MDM supernatants.

| Isolate | Donors | Copies/mL*           | Copies/mL*           |                      |                      | FFU/mL†              |                      |                      |
|---------|--------|----------------------|----------------------|----------------------|----------------------|----------------------|----------------------|----------------------|
|         |        | M1D7                 | Vero                 | C6/36                | JEG-3                | Vero                 | C6/36                | JEG-3                |
| CTS 30  | MDM 3  | 1.52x10 <sup>8</sup> | 8.03x10 <sup>6</sup> | 5.05x10 <sup>9</sup> | 0                    | 5.00x10 <sup>2</sup> | 4.50x10 <sup>6</sup> |                      |
|         | MDM 4  | 0                    | 1.62x10 <sup>2</sup> | 0                    | 6.54x10 <sup>1</sup> |                      |                      |                      |
|         | MDM 5  | 4.40x10 <sup>4</sup> | 0                    | 0                    | 3.40x10 <sup>8</sup> |                      |                      | 2.00x10 <sup>5</sup> |
|         | MDM 6  | 4.92x10 <sup>7</sup> | 0                    | 8.31x10 <sup>8</sup> | 7.09x10 <sup>8</sup> |                      | 1.30x10 <sup>7</sup> | 4.00x10 <sup>6</sup> |
| CTS 36  | MDM 3  | 2.14x10 <sup>7</sup> | 3.70x10 <sup>7</sup> | 4.77x10 <sup>9</sup> | 9.64x10 <sup>8</sup> | 4.50x10 <sup>5</sup> | 3.50x10 <sup>6</sup> | 2.10x10 <sup>5</sup> |
|         | MDM 4  | 0                    | 0                    | 0                    | 0                    |                      |                      |                      |
|         | MDM 5  | 4.81x10 <sup>2</sup> | 0                    | 0                    | 0                    |                      |                      |                      |
|         | MDM 6  | 5.79x10 <sup>3</sup> | 0                    | 0                    | 0                    | 0                    |                      |                      |
|         | MDM 8  | 0                    | 0                    | 0                    | 0                    |                      |                      |                      |
|         | MDM 9  | 0                    | 0                    | 0                    | 0                    |                      |                      |                      |
|         | MDM 10 | 1.52x10 <sup>3</sup> | 0                    | 0                    | 0                    | 0                    |                      |                      |
| CTS 47  | MDM 3  | 2.03x10 <sup>8</sup> | 1.95x10 <sup>7</sup> | 5.63x10 <sup>7</sup> | 8.61x10 <sup>8</sup> | 8.50x10 <sup>5</sup> | 6.00x10 <sup>6</sup> | 3.00x10 <sup>5</sup> |
|         | MDM 4  | 0                    | 0                    | 0                    | 0                    |                      |                      |                      |
|         | MDM 5  | 1.11x10 <sup>5</sup> | 0                    | 1.03x10 <sup>9</sup> | 6.47x10 <sup>8</sup> |                      | 1.60x10 <sup>7</sup> | 1.70x10 <sup>6</sup> |
|         | MDM 6  | 2.38x10 <sup>6</sup> | 5.63x10 <sup>7</sup> | 9.43x10 <sup>8</sup> | 7.88x10 <sup>8</sup> | 8.00x10 <sup>4</sup> | 1.90x10 <sup>7</sup> | 6.00x10 <sup>6</sup> |
| CTS 50  | MDM 3  | 1.98x10 <sup>8</sup> | 5.63x10 <sup>7</sup> | 6.09x10 <sup>9</sup> | 6.51x10 <sup>8</sup> | 3.50x10 <sup>5</sup> | 5.50x10 <sup>6</sup> | 2.00x10 <sup>6</sup> |
|         | MDM 4  | 0                    | 0                    | 0                    | 9.79x10 <sup>1</sup> |                      |                      |                      |
|         | MDM 5  | 1.69x10 <sup>5</sup> | 0                    | 0                    | 0                    |                      |                      |                      |
|         | MDM 6  | 3.12x10 <sup>7</sup> | 9.97x10 <sup>8</sup> | 4.54x10 <sup>8</sup> | 7.53x10 <sup>8</sup> | 2.50x10 <sup>6</sup> | 4.00x10 <sup>7</sup> | 2.00x10 <sup>6</sup> |
| CTS 56  | MDM 1  | 1.95x10 <sup>8</sup> | 6.96x10 <sup>8</sup> | 6.86x10 <sup>8</sup> | 6.22x10 <sup>8</sup> | 1.40x10 <sup>7</sup> | 6.00x10 <sup>7</sup> | 1.50x10 <sup>6</sup> |
|         | MDM 8  | 0                    | 0                    | 0                    | 0                    |                      |                      |                      |
|         | MDM 9  | 0                    | 0                    | 0                    | 0                    |                      |                      |                      |
|         | MDM 10 | 0                    | 0                    | 0                    | 0                    |                      |                      |                      |
| CTS 61  | MDM 1  | 6.67x10 <sup>4</sup> | 2.13x10 <sup>2</sup> | 7.12x10 <sup>8</sup> | 1.59x10 <sup>7</sup> |                      | 6.00x10 <sup>7</sup> | 2.00x10 <sup>4</sup> |
|         | MDM 8  | 1.73x10 <sup>4</sup> | 0                    | 0                    | 0                    |                      |                      |                      |
|         | MDM 9  | 4.96x10 <sup>5</sup> | 1.10x10 <sup>8</sup> | 2.14x10 <sup>9</sup> | 1.05x10 <sup>9</sup> | 3.50x10 <sup>4</sup> | 1.35x10 <sup>6</sup> | 2.60x10 <sup>7</sup> |
|         | MDM 10 | 4.57x10 <sup>5</sup> | 4.67x10 <sup>8</sup> | 1.93x10 <sup>9</sup> | 9.06x10 <sup>8</sup> | 7.50x10 <sup>4</sup> | 9.50x10 <sup>5</sup> | 1.70x10 <sup>7</sup> |
| CTS 178 | MDM 1  | 1.07x10 <sup>8</sup> | 1.57x10 <sup>3</sup> | 6.66x10 <sup>8</sup> | 3.31x10 <sup>8</sup> | 0                    | 6.50x10 <sup>4</sup> | 1.10x10 <sup>5</sup> |
|         | MDM 8  | 1.75x10 <sup>2</sup> | 0                    | 0                    | 0                    |                      |                      |                      |
|         | MDM 9  | 2.10x10 <sup>2</sup> | 0                    | 0                    | 0                    |                      |                      |                      |
|         | MDM 10 | 7.83x10 <sup>2</sup> | 0                    | 2.13x10 <sup>9</sup> | 0                    |                      | 8.00x10 <sup>7</sup> |                      |
| CTS 183 | MDM 3  | 6.12x10 <sup>7</sup> | 1.84x10 <sup>7</sup> | 5.19x10 <sup>9</sup> | 8.10x10 <sup>8</sup> | 3.50x10 <sup>5</sup> | 8.50x10 <sup>6</sup> | 6.00x10 <sup>5</sup> |
|         | MDM 4  | 0                    | 0                    | 1.88x10 <sup>2</sup> | 6.35x10 <sup>2</sup> |                      |                      |                      |
|         | MDM 5  | 0                    | 0                    | 0                    | 0                    |                      |                      |                      |
|         | MDM 6  | 8.15x10 <sup>5</sup> | 3.79x10 <sup>5</sup> | 8.74x10 <sup>8</sup> | 7.01x10 <sup>8</sup> | 1.00x10 <sup>3</sup> | 1.00x10 <sup>7</sup> | 3.50x10 <sup>6</sup> |
| CTS 193 | MDM 1  | 1.31x10 <sup>7</sup> | 0                    | 5.67x10 <sup>8</sup> | 1.75x10 <sup>8</sup> |                      | 1.00x10 <sup>7</sup> | 6.50x10 <sup>5</sup> |
|         | MDM 8  | 0                    | 0                    | 0                    | 0                    |                      |                      |                      |
|         | MDM 9  | 0                    | 0                    | 0                    | 0                    |                      |                      |                      |
|         | MDM 10 | 0                    | 0                    | 0                    | 0                    |                      |                      |                      |
| QTX 02  | MDM 3  | 4.31x10 <sup>4</sup> | 3.64x10 <sup>9</sup> | 0                    | 0                    | 1.00x10 <sup>7</sup> |                      |                      |
|         | MDM 4  | 0                    | 0                    | 0                    | 0                    |                      |                      |                      |
|         | MDM 5  | 0                    | 0                    | 0                    | 0                    |                      |                      |                      |
|         | MDM 6  | 0                    | 0                    | 0                    | 0                    |                      |                      |                      |
|         | MDM 8  | 0                    | 0                    | 0                    | 0                    |                      |                      |                      |
|         | MDM 9  | 0                    | 0                    | 0                    | 0                    |                      |                      |                      |
|         | MDM 10 | 0                    | 0                    | 0                    | 0                    |                      |                      |                      |

M1D7: culture supernatant was collected at Day 7 post-infection and tested by TaqMan RT-PCR assay. \*ZIKV genome (copies/mL) was determined by TaqMan RT-PCR assay; † The number of ZIKV infectious particles (FFU/mL) was determined by FFA. Blank cells: not tested by FFA.
